# Supplementary material for: A striatal-enriched intronic GPCR modulates huntingtin levels and toxicity
Source: eLife journal article supplement (doi:10.7554/elife.05449), 2015-03-04
Supplement: supp [file elife-05449-supp-v1.zip]

Figure 4-supplement 3

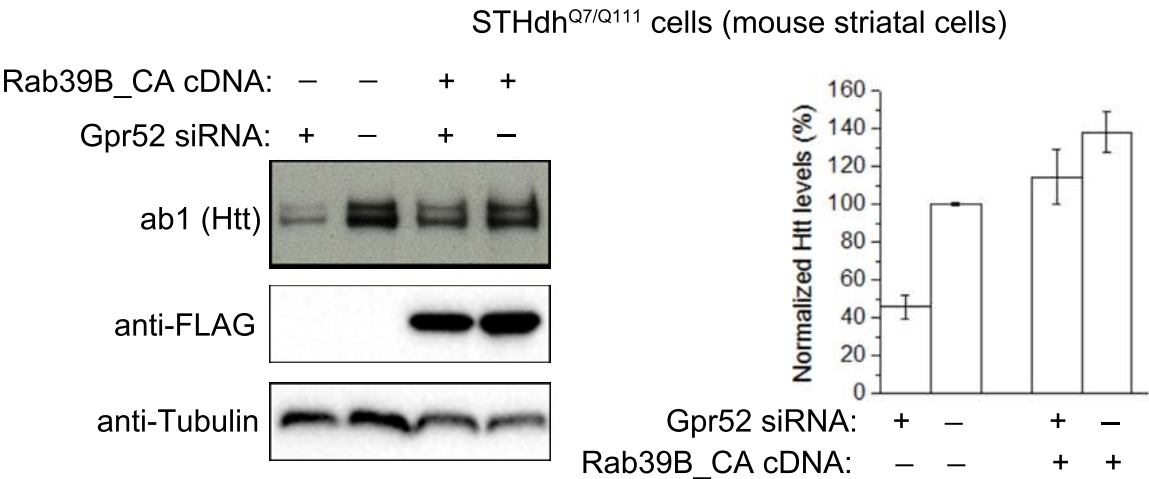

Figure 4-supplement 3. Constitutively active Rab39B blunts Gpr52’s effect

Left: Representative western-blot of Htt (ab1), consitutively active Rab39B (anti-FLAG for Rab39B\_CA), and the loading control (Tubulin). “-” indicates the empty vector or scrambled siRNA controls. Right: quantification of the normalized Htt signals, n = 4.
