# Supplementary material for: A striatal-enriched intronic GPCR modulates huntingtin levels and toxicity
Source: eLife journal article supplement (doi:10.7554/elife.05449), 2015-03-04
Supplement: supp [file elife-05449-supp-v1.zip]

### Figure 3-supplement 3

Gpr52's effect is not mediated by Rap1 or Rap2

Htt western-blot

Htt level changes measured by HTRF

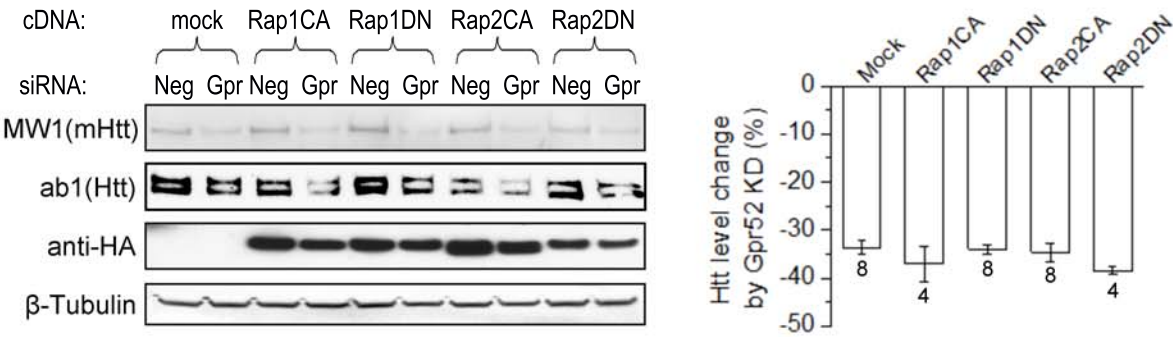

**Figure 3-supplement 3.** Gpr52's effect is not mediated by Rap1 or Rap2.

*Left:* Representative western-blot of STHdh<sup>Q7/Q111</sup> cells transfected with the Gpr52 siRNA (Gpr52\_si2) versus control siRNA, and then with constitutively active or dominant negative Rap1 (Rap1CA or Rap1DN) or Rap2 (Rap2CA or Rap2DN). The Bars plot: Htt level reduction (%) measured by 2B7/2166 HTRF of the total lysates of cells with same transfections as in the western-blot.
