# Supplementary material for: A striatal-enriched intronic GPCR modulates huntingtin levels and toxicity
Source: eLife journal article supplement (doi:10.7554/elife.05449), 2015-03-04
Supplement: supp [file elife-05449-supp-v1.zip]

Figure 3-supplement 2

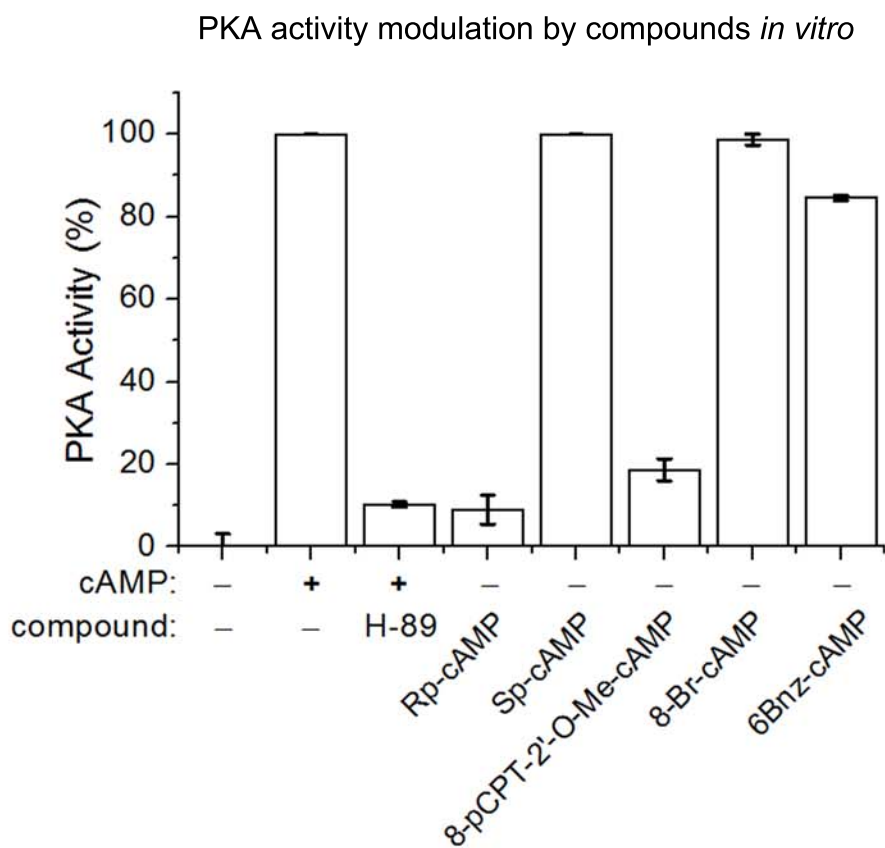

**Figure 3-supplement 2.** Modulation of PKA activity by PKA inhibitor or cAMP analogs

PKA kinase activities are measured by the cAMP-Glo kit (Promega) with a modified protocol in the *in vitro* condition. Basically, PKA activity is determined by the phosphorylation of the kinase substrate, which is detected by the reduction of the luciferase signal after 1 hour. The average signal without any cAMP or analogs is used as the baseline (0% PKA activity, bar 1). The average signal with 200 nM purified cAMP (a component in the kit) is set as the 100% PKA activity. The PKA inhibitor H89 was applied together with 200 nM cAMP and blocked ~90% of the PKA activity. Different cAMP analogs (200 nM) are tested for their ability to activate PKA. n = 6 for each sample. Rp-cAMP and 8-pCPT-2'-O-Me-cAMP do not activate PKA, whereas Sp-cAMP, 8-Br-cAMP and 6Bn-cAMP activate PKA as efficiently as cAMP.
