# Supplementary material for: A striatal-enriched intronic GPCR modulates huntingtin levels and toxicity
Source: eLife journal article supplement (doi:10.7554/elife.05449), 2015-03-04
Supplement: supp [file elife-05449-supp-v1.zip]

Figure 1-supplement 1

A Representative western-blots in STHdh<sup>Q7/Q111</sup> cells

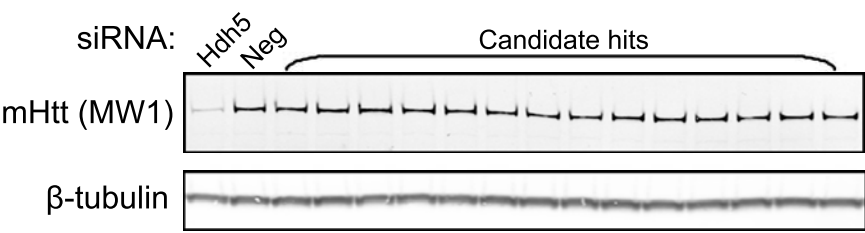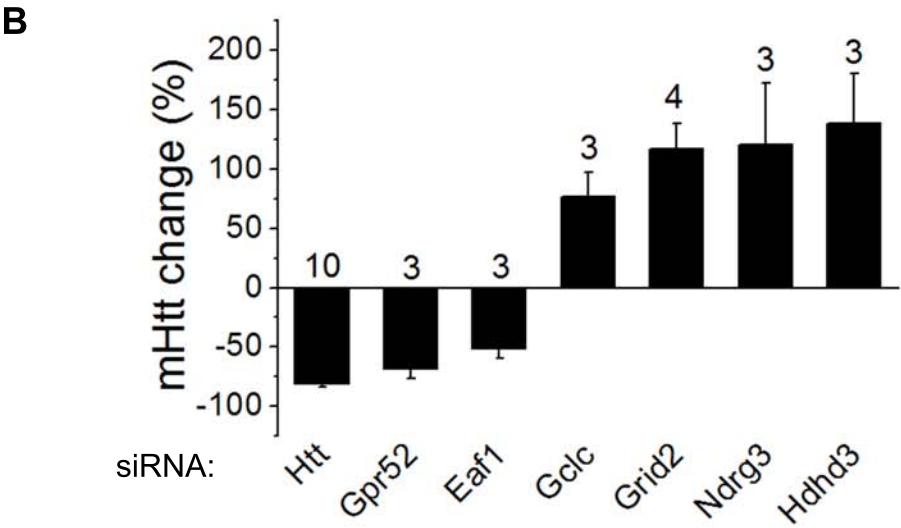

**Figure 1-supplement 1.** Screening for modulators of Htt levels in the striatal cells (STHdh)

**(A)** Representative western-blots in the STHdh<sup>Q7/Q111</sup> cells of candidate modifiers of mHtt levels. 104 candidate modifiers were selected based on our previous screening results (doi: 10.1038/nn.3367, Supplementary table 1). The genes that had averaged Z score values larger than 1.2 and were not previously identified as validated hits in the patient fibroblasts were selected for testing in STHdh cells by pooled siRNAs (Dharmacon, custom library). The MW1 detected full length mHtt is quantified and normalized to the tubulin signal using the ImageJ software. The siRNAs that change mHtt levels by more than 30% in the same direction in three biological repeats were selected as hits. The number on top of each bar indicates the biological repeat number of siRNA knock-down.

**(B)** The bar plot of mHtt level changes upon knock-down of the identified modifiers. The numbers on top of each bar represent the number of biological replicates tested.
