# Supplementary material for: A striatal-enriched intronic GPCR modulates huntingtin levels and toxicity
Source: eLife journal article supplement (doi:10.7554/elife.05449), 2015-03-04
Supplement: supp [file elife-05449-supp-v1.zip]

Figure 4-supplement 2

No increase of Htt co-localization with Rab22A

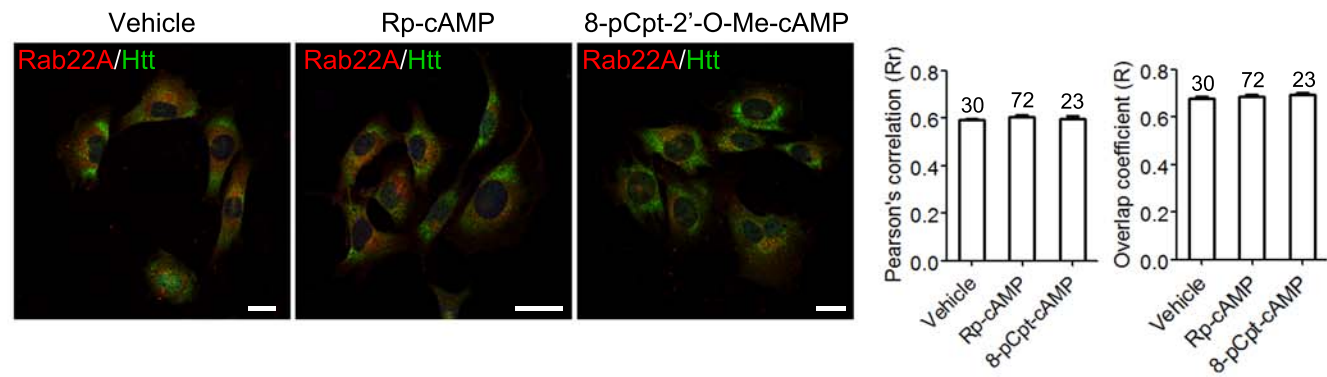

Figure 4-supplement 2. No increase of Htt co-localization with Rab22A

Representative confocal microscopic immunofluorescent images of Htt and Rab22A in STHdh<sup>Q7/Q111</sup> cells and the quantification analysis of co-localization. Treatments with 1 μM RP-cAMP or 1 μM 8-pCPT-2'-O-Me-cAMP for 48 hours leads to no change of co-localization between Gpr52 and Rab22A. Red: Rab22A; Blue: DAPI; Green: Htt (using antibody 2051); Scale bars: 20 μm.
