# Supplementary material for: A striatal-enriched intronic GPCR modulates huntingtin levels and toxicity
Source: eLife journal article supplement (doi:10.7554/elife.05449), 2015-03-04
Supplement: supp [file elife-05449-supp-v1.zip]

Figure 3-supplement 1

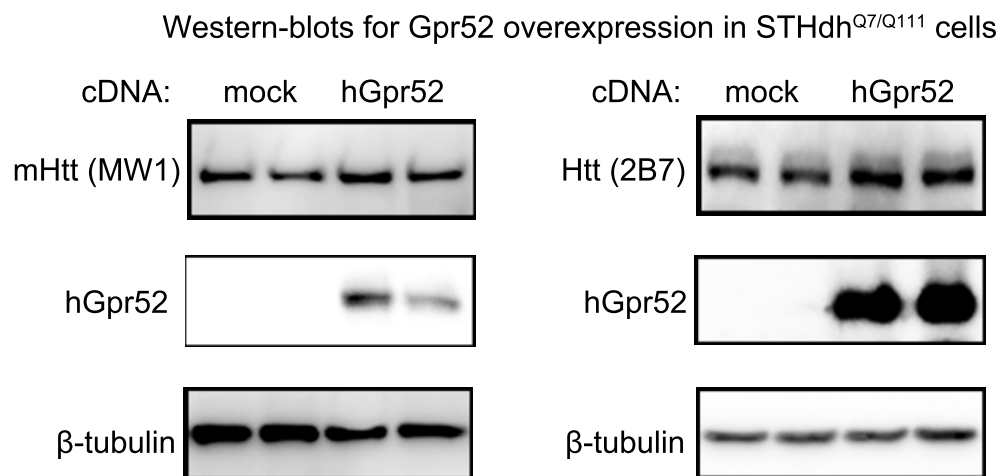

**Figure 3-supplement 1.** Over-expression of human Gpr52 cDNA in STHdh cells  
Representative western-blot showing increased Htt levels and over-expression of human Gpr52 (hGpr52) in STHdh<sup>Q7/Q111</sup> transfected with the hGpr52 cDNA.
